# Supplementary material for: Convective assembly of silica colloidal particles inside photonic integrated chip-based microfluidic systems for gas sensing applications
Source: Royal Society of Chemistry journal article supplement (doi:10.1039/d4nr02211d), 2024-01-01
Supplement: d4nr02211d1.pdf [file d4nr02211d1.pdf]

# Convective assembly of silica colloidal particles inside of photonic integrated chip based microfluidic systems for gas sensing applications

Valeriy Zaytsev,<sup>\*,§,a</sup> Aleksei Kuzin,<sup>\*,§,a,b,c</sup> Krupamaya Panda,<sup>a</sup> Vasiliy Chernyshev,<sup>d</sup> Irina Florya,<sup>b</sup> Fedor S. Fedorov,<sup>a</sup> Vadim Kovalyuk,<sup>b,c</sup> Alexander Golikov,<sup>b,e</sup> Pavel P. An,<sup>e,h</sup> Boris N. Khlebstov,<sup>f,g</sup> Margarita Chetyrkina,<sup>a</sup> Albert G. Nasibulin,<sup>a</sup> Gregory Goltsman,<sup>c,h</sup> and Dmitry A. Gorin<sup>\*,a</sup>

<sup>a</sup> Center for Photonic Science and Engineering, Skolkovo Institute of Science and Technology, 30 Bld. 1 Bolshoy Boulevard, 121205, Russia. Address here.

<sup>b</sup> Laboratory of Photonic Gas Sensors, University of Science and Technology MISIS, 119049, Russia.

<sup>c</sup> National Research University Higher School of Economics, 101000, Russia.

<sup>d</sup> National Medical Research Center for Obstetrics, Gynecology and Perinatology named after Academician V.I. Kulakov, Ministry of Healthcare of the Russian Federation, 117198, Moscow, Russia.

<sup>e</sup> Department of Physics, Moscow State Pedagogical University, 119992, Russia.

<sup>f</sup> Institute of Biochemistry and Physiology of Plants and Microorganisms, Saratov, 410049, Russia.

<sup>g</sup> Saratov State University, Saratov, 410012, Russia.

<sup>h</sup> Quantum Photonic Integrated Circuits Group, Russian Quantum Center, Skolkovo, 143025, Russia.

<sup>§</sup> The authors contributed equally to this work

\* Corresponding authors: [valeriy.zaytsev@skoltech.ru](mailto:valeriy.zaytsev@skoltech.ru); [aleksei.kuzin@skoltech.ru](mailto:aleksei.kuzin@skoltech.ru); [d.gorin@skoltech.ru](mailto:d.gorin@skoltech.ru)

## 22 S1. SURFACE COVERAGE ESTIMATIONS USING THE OTSU ALGORITHM

23 The surface coverage of the silica layers on  $Si_3N_4$  the surface were processed using openCV Python package, version 3.3.9.7. Otsu  
24 thresholding<sup>s1</sup> with the minor code modifications. Feng *et al.* also implemented the OTSU algorithm to estimate the surface  
25 coverage of the monolayer films.<sup>s2</sup> The empty locations between the silica particles were designated as a background. As show in  
26 **Fig. S1**, following the conversion of an RGB SEM image to a gray scale image, a combination of binary conversion and Otsu's  
27 algorithm was applied.

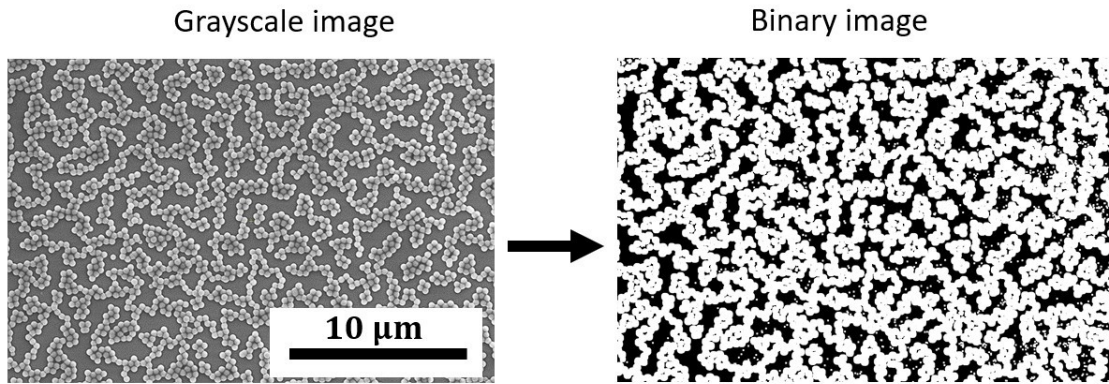

28

29 **Fig. S1.** Representation of processing a grayscale SEM image to a binary one by Otsu thresholding.

30 A grayscale image can be considered as a 2D matrix containing pixel values in the range of [0; 255], where 0 refers to black, and  
31 255 refers to white. Then, a processed image undergoes several iterations of operations 'erode' and 'dilate'. The 'erode' operation  
32 helps in removing noises in the images, i.e., the other shades, and smooths out the pixels with most abundant pixel value. When  
33 'erode' operation is applied, it removes the unnecessary white pixels from the background, while the use of 'dilate' function,  
34 which considers the background as noise, helps in eliminating the black pixels from the regions representing spherical particles.

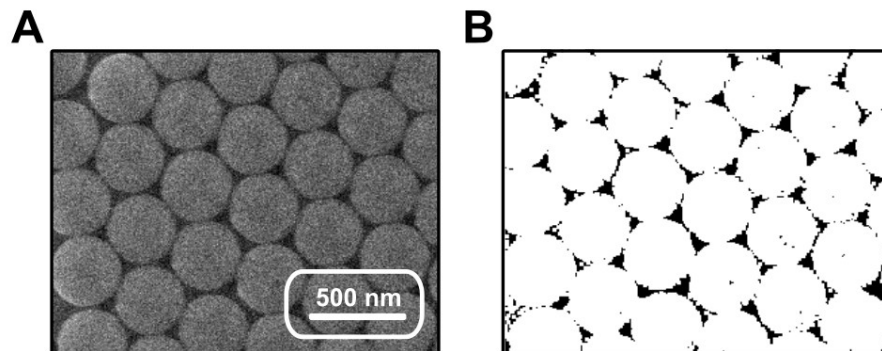

35

36 **Fig. S2.** Use of Otsu thresholding to a *hcp* silica monolayer.

37 We considered 5 to 10 images, where each image was obtained from a different number of 'dilate' iterations. After comparing  
38 the binary images with the original image, three images were selected. The final fill factor was the mean of fill factors calculated  
39 from these three images. Here, it is worth noting that the number of iterations for 'dilate' function can greatly influence on the  
40 fill factor. Thus, the decision if the binary image fits with the actual SEM image or not, solely depends upon the judgement of the  
41 user. This puts the factor of human error into the calculations. The use of this method for a binary image of a *hcp* monolayer of  
42 spherical silica particles (see **Fig. S2**) depicts a coefficient of surface coverage of  $92 \pm 3 \%$  ( $n=3, P=0.95$ ). This agrees well with the

43 value of an ideal *hcp* monolayer, which is equal to  $\frac{\pi}{2\sqrt{3}} \approx 90.7 \%$ . However, poor contrast between substrate and particle  
44 monolayers in SEM images will be a disadvantage of this method since it will be difficult to trace the boundaries between void  
45 and coated regions.

## 46 S2. SUBSTRATE FABRICATION

47 We fabricated microfluidic channels by using soft lithography. The microfluidic chip contained polydimethylsiloxane (PDMS)  
48 channels with a square shaped cross-section  $500\ \mu\text{m} \times 500\ \mu\text{m}$ . A master-form of the microfluidic chip was obtained on acrylic  
49 plastic by using computer numerical control milling. To produce PDMS, a mixture of silicon elastomer and curing agent at a 10:1  
50 ratio was prepared. To remove air-bubbles from PDMS prior to baking, the prepared mixture was placed inside the master-form  
51 structure and into a low vacuum chamber. The master-form containing PDMS was then baked at  $60\ ^\circ\text{C}$  for four hours. PDMS was  
52 then removed and washed with ethanol prior to its combination with the photonic chip.

53 For the fabrication of micro-ring resonators (MRRs), commercially available silicon nitride ( $\text{Si}_3\text{N}_4$ ) substrates consisted of a 450 nm  
54 of low-pressure chemical vapour deposition  $\text{Si}_3\text{N}_4$  on top of a silicon substrate with an initial  $2.6\ \mu\text{m}$  thick layer of  $\text{SiO}_2$ . For  
55 waveguide formation, electron beam lithography and then partial etching was done by using reactive ion etching (Fig. S3a). This  
56 resulted in 180 nm of partially etched rib waveguides (Fig. S3b) and focusing grating couplers (Fig. S3c). The fabricated photonic  
57 circuit had eight non-intersecting ring resonators with ring radius of  $150\ \mu\text{m}$ . The MRRs also had varying coupling gaps between  
58 bus and ring waveguides, i.e., 500 nm, 650 nm, 800 nm and 1000 nm. The MRRs in the opposite row had identical coupling gaps.  
59 The fabrication process was controlled with SEM and AFM techniques (Fig. S3d).

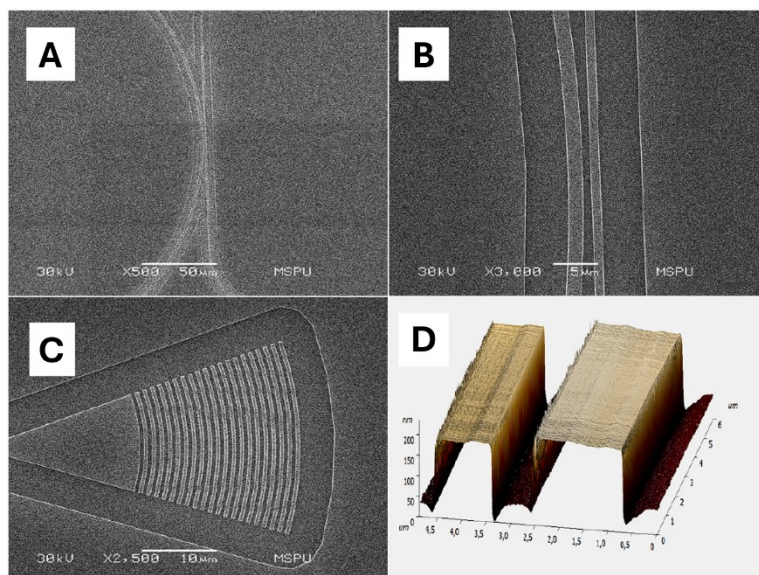

60

61 **Fig. S3. Micro-ring resonator characterization.** (a) SEM image of MRR. (b) SEM image of mode coupling gap region of MRR. (c)  
62 SEM image of focusing grating coupler. (d) AFM topography of gap region depicting the etching depth of less than 200 nm for  
63 photonic structures.

## 64 S3. DIP COATING

65 **Silicon nitride substrate cleaning protocol.** Firstly, the contaminated surface was thoroughly washed with distilled water, followed  
66 by drying in the inert atmosphere. Then, to remove organic impurities from the surface, the following cleaning protocol was  
67 carried out: washing alternately with acetone (99.8%, EKOS-1) / propanol-2 (99.8%, EKOS-1) in an ultrasonic (US) bath for 7  
68 minutes for each solvent, followed by washing with deionized water and drying. Afterwards, the surfaces of the substrates were  
69 cleaned in a "Piranha" solution ( $\text{H}_2\text{SO}_4 : \text{H}_2\text{O}_2$  (3 : 1)) under US and a temperature of  $50\ ^\circ\text{C}$  for 15 minutes, then in a solution of  $\text{NH}_3$   
70 (25% solution) :  $\text{H}_2\text{O} : \text{H}_2\text{O}_2$  (3 : 1 : 1) at the ultrasound and a temperature of  $50\ ^\circ\text{C}$  within 15 minutes. The treated surface was  
71 washed in a stream of deionized water and dried in the inert atmosphere.

72 The preliminary cleaning of the surface using the RCA1 method<sup>53</sup> was critical for forming a highly ordered silica monolayer. This  
73 can be explained by the more intense removal of organic and inorganic surface impurities by the alternating action of oxidizing  
74 agents,  $\text{H}_2\text{SO}_4 : \text{H}_2\text{O}_2$  (3 : 1) and  $\text{NH}_3$  (25% solution) :  $\text{H}_2\text{O} : \text{H}_2\text{O}_2$  (3 : 1 : 1), respectively, and mechanical impurities by the action of  
75 ultrasound due to the cavitation effect.<sup>54</sup>

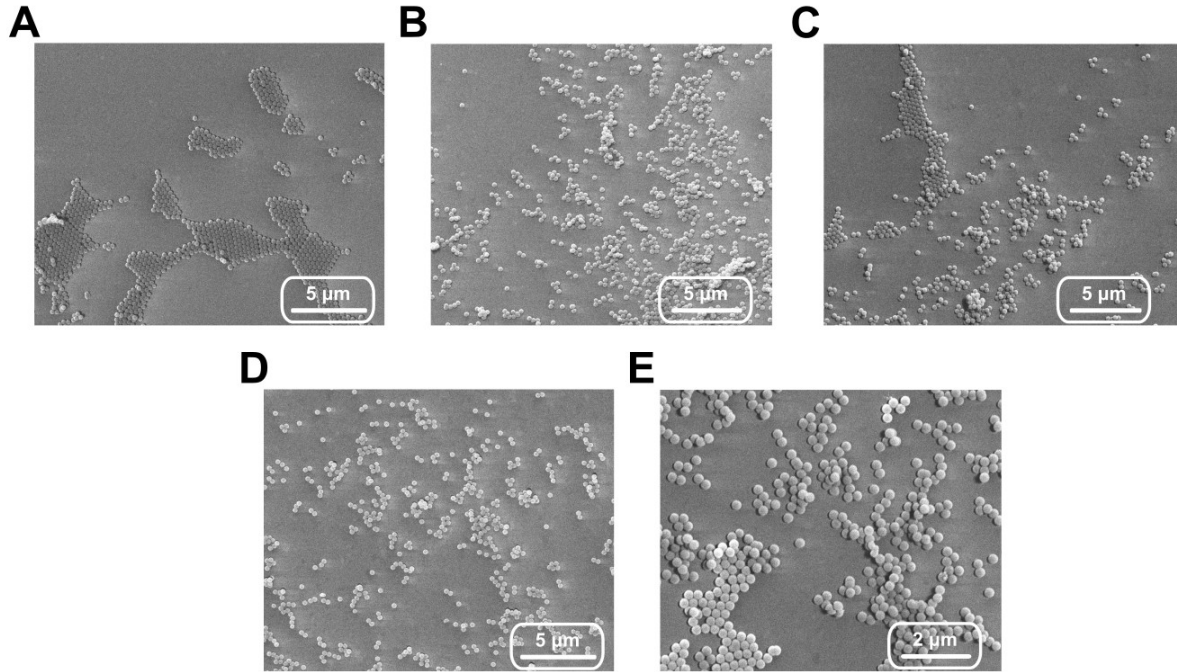

76

77 **Fig. S4. Influence of withdrawal speed on the SiO<sub>2</sub> layer deposition:** (A)  $v_{\text{withdrawal}} = 0.6 \frac{\text{mm}}{\text{min}}$ ; (B)  $v_{\text{withdrawal}} = 5 \frac{\text{mm}}{\text{min}}$ ; (C)  
 78  $v_{\text{withdrawal}} = 14 \frac{\text{mm}}{\text{min}}$ ; (D)  $v_{\text{withdrawal}} = 27 \frac{\text{mm}}{\text{min}}$ ; (E)  $v_{\text{withdrawal}} = 41 \frac{\text{mm}}{\text{min}}$  (pristine Si<sub>3</sub>N<sub>4</sub> substrate;  
 79  $v_{\text{dip}} = 41 \frac{\text{mm}}{\text{min}}$ ;  $t_{\text{incubation}} = 7 \text{ min}$  ).

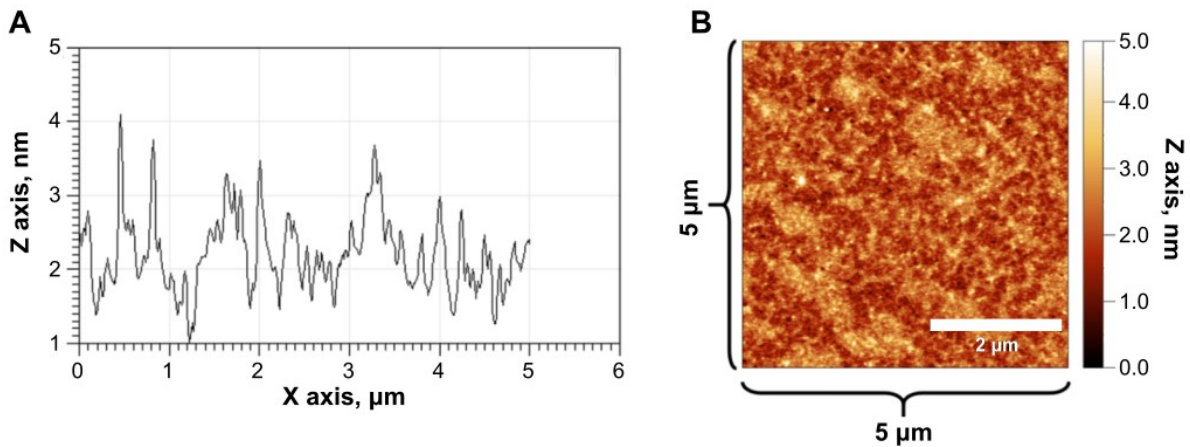

80

81 **Fig. S5. The estimation of a thickness (A) and topology (B) of the surface profile of PEI-modified surface in the microfluidic channel.**

82

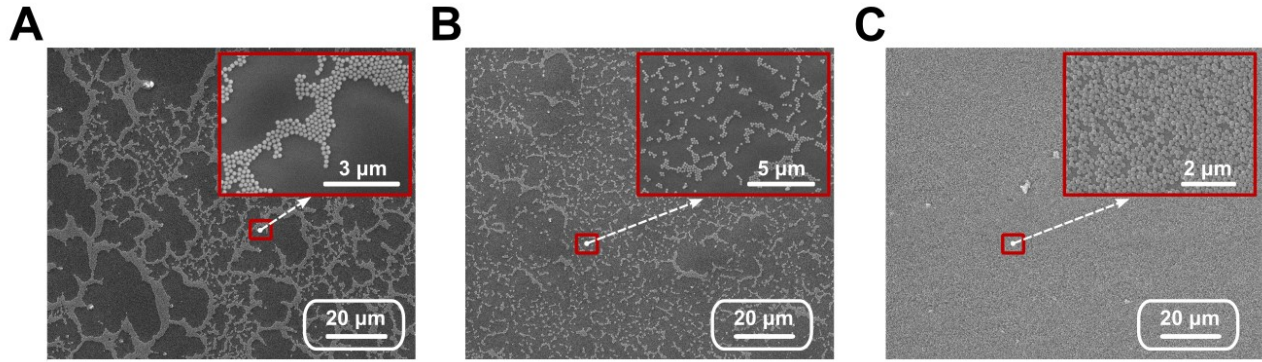

83

84 **Fig. S6. Silica layer deposition by dip-coating:** (A) pristine  $\text{Si}_3\text{N}_4$  substrate; (B) PAH-modified  $\text{Si}_3\text{N}_4$  substrate; (C) PEI-modified  $\text{Si}_3\text{N}_4$   
 85 substrate ( $v_{dip} = 41 \frac{\text{mm}}{\text{min}}$ ;  $t_{incubation} = 7 \text{ min}$ ;  $v_{withdrawal} = 1 \frac{\text{mm}}{\text{min}}$ ).

86 **Landau-Levich equation:**

$$h = c \cdot \frac{(\eta \cdot v)^{2/3}}{\gamma_{lv}^{1/6} \cdot (\rho \cdot g)^{1/2}},$$

87  
88 (1)

89 where  $h$  - the film thickness;  $c$  - non-dimensional empirical coefficient;  $\eta$  - viscosity of medium;  $v$  - withdrawal rate of a  $\text{Si}_3\text{N}_4$   
 90 substrate;  $\gamma_{a/l}$  - surface tension of air/liquid interface;  $\rho$  -  $\text{SiO}_2$  density;  $g$  - gravity.

#### 91 **S4. CONVECTIVE ASSEMBLY IN MICROFLUIDICS**

92 SEM images of the particles assembled inside a microfluidic channel of width  $500 \mu\text{m}$  and height  $500 \mu\text{m}$  are presented in **Fig. S7**.  
 93 The  $\text{Si}_3\text{N}_4$  surfaces were pristine and cleaned using the substrate cleaning protocol. Here, we observed that the particles organized  
 94 separated island aggregates due to capillary forces and inert features of the silicon nitride surface. Additionally, **Fig. S10**  
 95 demonstrates aggregated non-homogeneous multilayer structures at the channel borders due to movement of the meniscus with  
 96 a flow rate slower than in the central part of the channel.

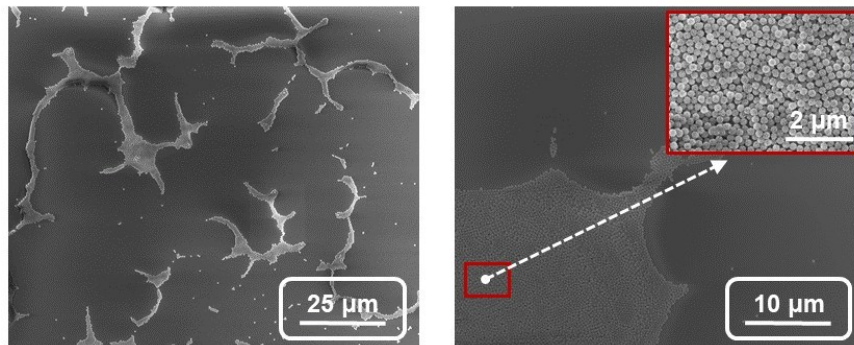

97

98 **Fig. S7. Microfluidic deposition of silica layers on the pristine  $\text{Si}_3\text{N}_4$  surface.** (  
 99  $v_{filling} = 5 \frac{\mu\text{L}}{\text{min}}$ ;  $v_{outflow} = 15 \frac{\mu\text{L}}{\text{h}}$ ;  $t_{stabilization} \approx 2 \text{ min}$ ; the channel parameters:  $500 \mu\text{m} \times 500 \mu\text{m}$ )

100 S5. SILICA COATINGS ON PEI and PSS MODIFIED SILICOM NITRIDE SURFACES

101

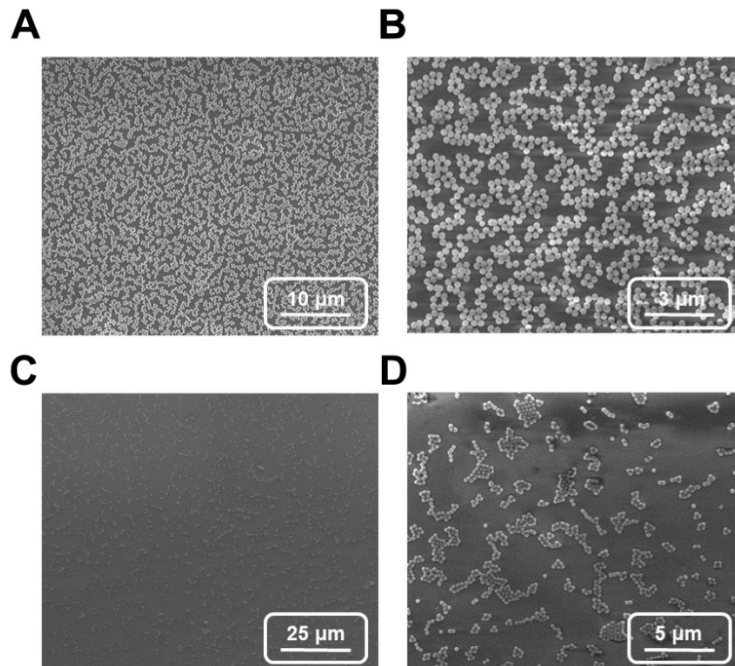

102

103 **Fig. S8.** Silica deposition on the polyelectrolyte modified  $\text{Si}_3\text{N}_4$  surface by microfluidic deposition: (A, B) PEI-modified channel;

104 (C, D) PSS-modified channel ( $v_{filling} = 5 \frac{\mu\text{L}}{\text{min}}$ ;  $v_{outflow} = 50 \frac{\mu\text{L}}{\text{h}}$ ;  $t_{stabilization} \approx 2 \text{ min}$ ; the channel parameters:  $500 \mu\text{m} \times$   
 105  $500 \mu\text{m}$ ).

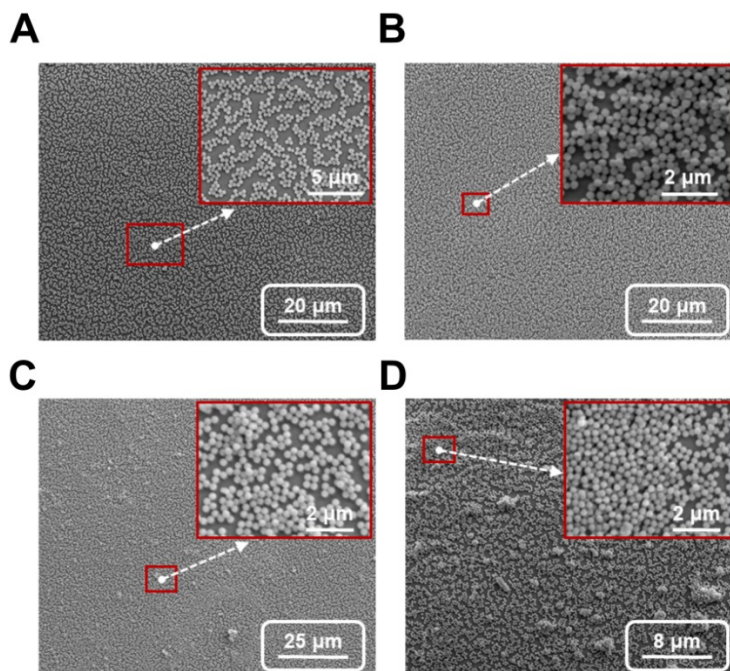

106

107 Fig. S9. Silica deposition on the PEI-modified  $\text{Si}_3\text{N}_4$  surface by microfluidics under different suspension flow rates: (A)

108  $v_{outflow} = 10 \frac{\mu\text{L}}{\text{h}}$ ; (B)  $v_{outflow} = 25 \frac{\mu\text{L}}{\text{h}}$ ; (C)  $v_{outflow} = 50 \frac{\mu\text{L}}{\text{h}}$ ; (D)  $v_{outflow} = 100 \frac{\mu\text{L}}{\text{h}}$  (

109  $v_{filling} = 5 \frac{\mu\text{L}}{\text{min}}$ ;  $t_{stabilization} \approx 2 \text{ min}$ ;  
the channel parameters:  $500 \mu\text{m} \times 500 \mu\text{m}$ ).

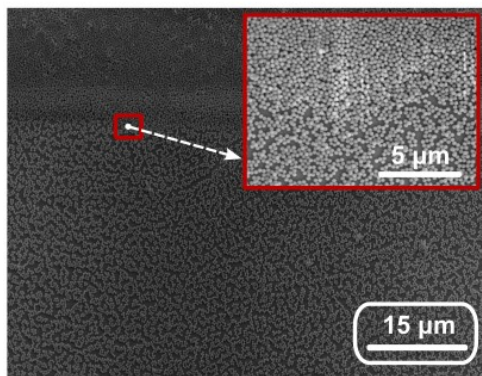

110

111 Fig. S10. Microfluidic deposition of silica layers on the PEI-modified  $\text{Si}_3\text{N}_4$  surface. (

112  $v_{filling} = 5 \frac{\mu\text{L}}{\text{min}}$ ;  $v_{outflow} = 50 \frac{\mu\text{L}}{\text{h}}$ ;  $t_{stabilization} \approx 2 \text{ min}$ ;  
the channel parameters:  $500 \mu\text{m} \times 500 \mu\text{m}$ )

## 113 S6 INFLUENCE OF THE FORMED SILICA MICROSPHERE LAYERS ON THE SENSOR PERFORMANCE

114 Synthesis and characterization of spherical submicron silica particles ( $\text{SiO}_2$  SMPs) was demonstrated in our previously published  
115 work.<sup>55</sup> A comparison of particles' average diameters was provided *via* transmission electron microscopy (TEM) and dynamic light  
116 scattering (DLS) methods ( $299 \pm 3 \text{ nm}$ ). Particle average diameters were not invariably similar due to the presence of aggregates,  
117 the number of which depends on the holding time of  $\text{SiO}_2$  SMP suspensions in an ultrasonic bath. The value of  $\zeta$ -potential is  $-56$   
118  $\pm 2 \text{ mV}$ , which indicates high colloidal stability of the synthesized silica particles.

119 The uniformity in diameter and sphericity of the silica microspheres directly affects the average Q factor of the micro-ring  
120 resonators. In the case of slightly changed diameters of  $\text{SiO}_2$  SMPs ( $299 \pm 3 \text{ nm}$ ), optical losses at the central wavelength equal  
121 to  $1550 \text{ nm}$  will be negligible. Fig. S11 demonstrates the results of the simulation for estimation of the influence of the  $\text{SiO}_2$  SMPs  
122 on the Q factor performed in COMSOL Multiphysics. A 2D model of the waveguide cross-section was used to calculate the effective  
123 refractive index ( $n_{eff}$ ) and attenuation constant for fundamental TE and TM modes, characterized the interaction of evanescent  
124 optical mode with the  $\text{SiO}_2$  SMPs. A low optical power loss signifies a high Q factor and sharper resonance peaks, which translates  
125 to improving the limit of detection (LoD) caused by gas adsorption. Non-uniform particles would introduce variability in the  
126 resonance conditions, broadening the resonance peaks and reducing the LoD.

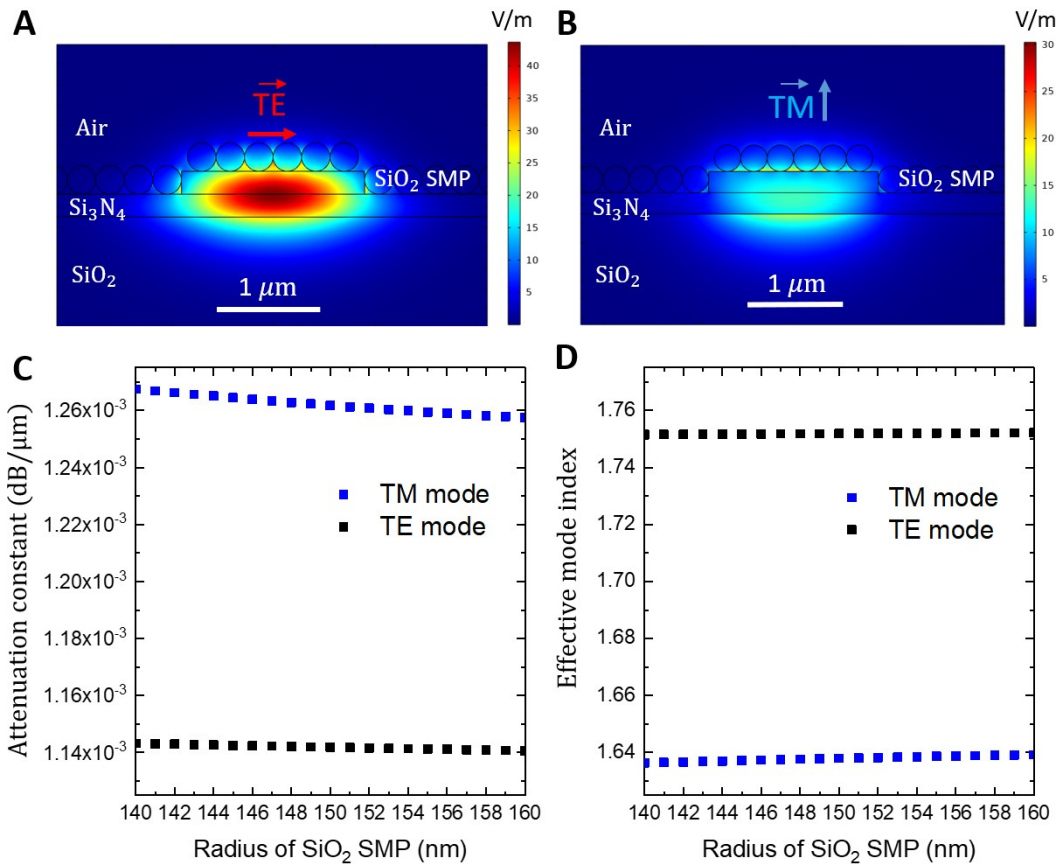

127

128 **Fig. S11. Optical characteristics of micro-ring resonators uncoated/coated by silica particles for one monolayer coating.**  
 129 Distribution of the normalized electric (A) and magnetic (B) field in the cross-section model of a semi-etched waveguide. (C)  
 130 Dependence of attenuation constant on the radius of Si<sup>O</sup><sub>2</sub> SMP. (D) Dependence of  $n_{eff}$  on the radius of Si<sup>O</sup><sub>2</sub> SMP.  
 131

132 Besides uniform the diameter control of the SiO<sub>2</sub> SMPs, an optimal concentration was found to ensure a close-packed monolayer  
 133 without causing agglomeration or multilayer formation (Fig. S7-S10). High concentration can lead to overlapping of particles,  
 134 while low concentration might result in a defective monolayer with low coverage monolayer, both of which can degrade the  
 135 sensing performance. A uniform and well-packed monolayer ensures consistent micro-ring resonances across the sensor,  
 136 enhancing the overall sensitivity and reliability. Variations in particle concentration during the assembly process can lead to  
 137 defects and non-uniformity in the monolayer, adversely affecting the Q factor and sensitivity.

138

### 139 S7 GAS SENSING PERFORMANCE BY SILICA PARTICLES COATED MICRO-RING RESONATORS

140 To estimate the influence of CPCs on the optical characteristics of silicon nitride MRRs, and the gas sensing performance, the  
 141 following tasks were carried out: (1) monitoring the effect of CPC on MRR characteristics; (2) determining the relative shift of the  
 142 resonance position of MRRs due to introduction of saturated vapours of the studied analytes in the channel. All experimental  
 143 work, such as film deposition and measurements were carried out at room temperature. For the first experiment, one of the  
 144 channels was chosen for coating and the other channel was left as a reference with uncoated MRRs for the next step. The optimal  
 145 channel geometry and flow rates were determined from the previous experiments with PEI-modified micro-channels on Si<sub>3</sub>N<sub>4</sub>  
 146 surface. In the second step, vapours were pumped through the channel by using a peristaltic pump, and transmission spectral  
 147 characteristics were measured.  
 148



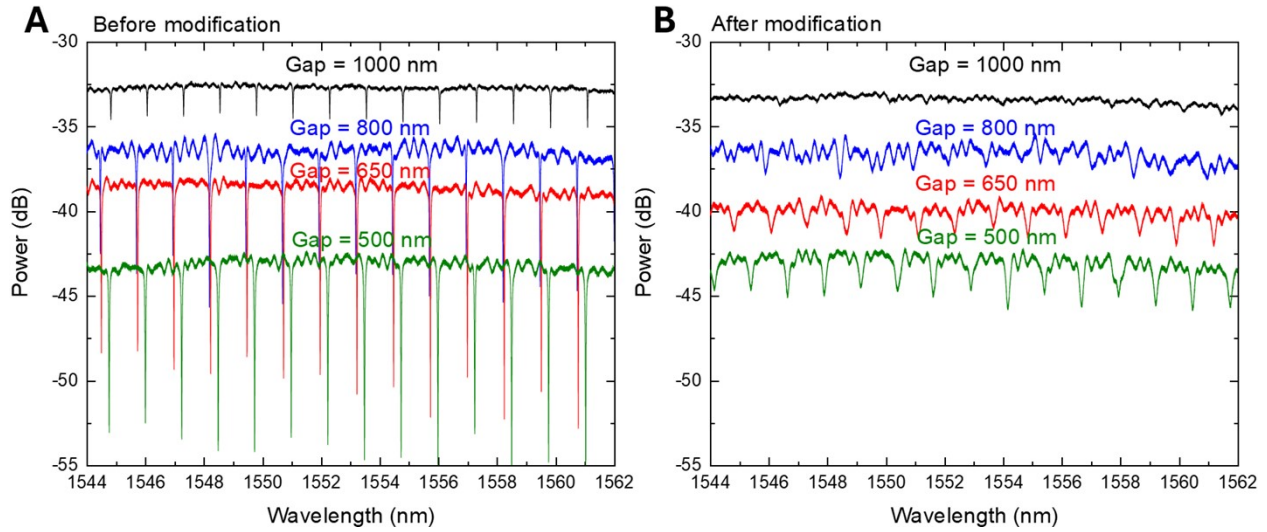

149

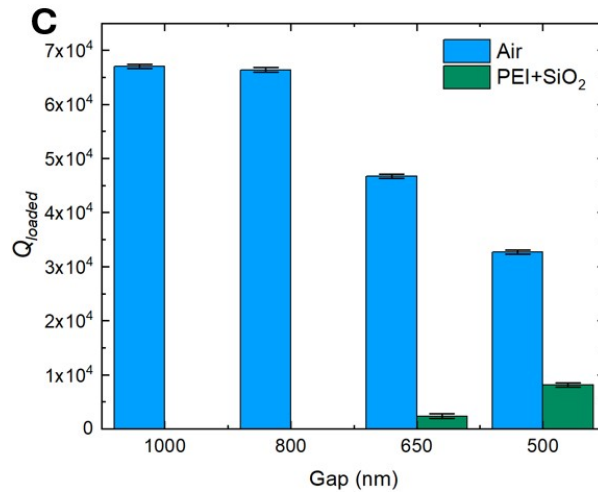

150

151 **Fig. S12. Optical characteristics of micro-ring resonators uncoated/coated by silica particles.** The comparison between the  
 152 transmitted spectra of MRR1, MRR2, MRR3, and MRR4 before (A) and after depositing PEI+SiO<sub>2</sub> cladding (B), correspondingly.  
 153 There are four devices: MRR1 (gap = 1000 nm;  $y_{shift} = 0$  dB), MRR2 (gap = 800 nm;  $y_{shift} = 10$  dB), MRR3 (gap = 650 nm;  
 154  $y_{shift} = 5$  dB) and MRR4 (gap = 500 nm,  $y_{shift} = 1$  dB). (C) Bar chart of the external quality factor of resonators before (air  
 155 cladding) and after PEI+SiO<sub>2</sub> cladding deposition of the silica film.

156 For optimization of MRR geometry during PEI modification, the gaps between bus and ring waveguides were 1000 nm, 800 nm,  
 157 650 nm, and 500 nm for respective resonators going from left to right in both rows. The MRR on the far left of Fig. S10 is labeled  
 158 as MRR1, and consequently, the devices going from left to right are labeled as MRR2 to MRR 4. The left end of the micro-channels  
 159 was used as the inlet, and the opposite end was used as the outlet. As it was demonstrated in the recent works,<sup>s6-s8</sup> the chip was  
 160 kept constant during the experiment. The microfluidic-nanophotonic sensor was placed upon an adjustable 3D stage with a heater  
 161 and thermometer. The proportional-integral-derivative PID controller was used for stabilizing the temperature on the table to be  
 162 equal to 25°C. To provide TE single-mode propagation regime, focusing grating couplers with an efficiency of 18% to input &  
 163 output optical radiation from the photonic chip were used.<sup>s9</sup> The polarization controller was used to achieve maximum signal at  
 164 transmission, which corresponded to the TE - mode. Fig. S12 A, B demonstrates the transmission spectrum for MRRs with different  
 165 gaps in case of uncoated/coated by silica particles of sensitive sensor surface. It was found that the deposition of silica particles  
 166 to the sensitive surface of the device and gap area did not lead to significant changes in the transmission spectrum of the PIC  
 167 structure. In contrast, the quality factor of the MRRs is sharply reduced with the deposition of silica particles, which makes it  
 168 impossible to operate devices with wide gaps (Fig. S12 C).

169  
170

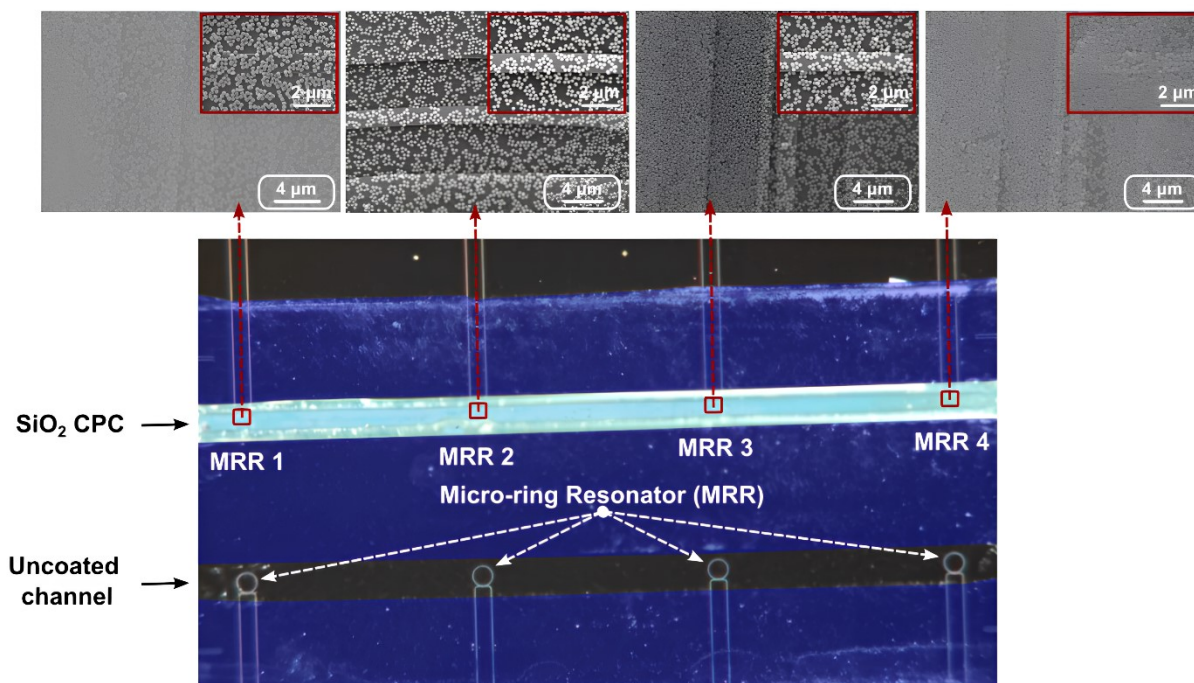

171

172 Fig. S13. The micro-ring resonators coated and uncoated by SiO<sub>2</sub> CPCs. (

173  $v_{filling} = 5 \frac{\mu L}{min}$ ;  $v_{outflow} = 50 \frac{\mu L}{h}$ ;  $t_{stabilization} \approx 2 min$ ;  
channel parameters: 500 μm × 500 μm).

174 Firstly, the photonic chip with MRRs and PDMS chip were manually stacked together by using a custom holder with adjustable  
175 XYZ coordinates and angle in the XY coordinates. The microfluidic chip contained two 13 mm long, 500 μm wide, and 500 μm high  
176 micro-channels. The channels were aligned such that the centers of MRRs of both rows (see Fig. S13), coincided with the center  
177 of the channels. The colloidal suspension was first slowly pumped inside the channel at a flow rate of 10 μL/min and withdrawn  
178 at a flow rate of 50 μL/h. During experiments, the temperature of the copper stage was slowly increased to 60°C and left for drying  
179 for one hour. Afterward, the chip was slowly cooled down to room temperature, again heated for a few minutes at 60°C after  
180 depositing coating in one of the channels.

181

182 The formation of the *hcp* silica layer on the surface might be an extremely complex process even on a planar substrate surface.  
183 Particularly, the principles of dense layer formation are in conjunction of the DLVO theory, the Derjaguin-Muller-Toporov adhesion  
184 theory, the Johnson-Kendal-Roberts theory, and the stability of laminar flow in the micro-channels. Therefore, taking into account  
185 the aspects of these theoretical models and the complicated structure of the nano-patterned surface of the micro-ring resonators  
186 and waveguides, we would like to note some significant parameters, which might affect the lattice structure of silica CPC on the  
187 micro-ring resonators.

188 First, the preliminary modification of the Si<sub>3</sub>N<sub>4</sub> surface by PEI for the surface of the channels creates additional contacts between  
189 individual particles and the walls of nano-patterned cavities, particularly by electrostatic interaction between them and due to  
190 the artificial surface roughness of the nano-patterned surface (see Fig. S5). Additionally, we may estimate the ratio  $\theta$  between  
191 the number of silica particles in the suspension and the maximum number of surface sites for *hcp* formation of CPC. As the depth  
192 of the nano-pattern is  $225 \pm 12$  nm which is less than the diameter of an individual particle ( $d = 300$  nm), we may conclude that  
193 the walls of the nano-patterned cavities do not provide the additional sites for adhesion of the particles. Considering the  
194 dimensions  $l \times w \times h$  of the microfluidic channel equal to  $10 \times 0.5 \times 0.5$  mm, we calculate the ratio between the number of silica  
195 particles in the suspension  $N_{SiO_2}$  and the number of active sites  $N_{sites}$  according to Equations 2 – 4:

196

$$N_{SiO_2} = \frac{C_{SiO_2} \cdot l \cdot w \cdot h}{\frac{4}{3} \pi \cdot R^3 \cdot \rho_{SiO_2}} \quad (2)$$

197

$$N_{sites} = \frac{\varphi \cdot l \cdot w}{\pi \cdot R^2} \quad (3)$$

198

$$\theta = \frac{N_{SiO_2}}{N_{sites}} \approx 1.6 \cdot 10^3, \quad (4)$$

199 where  $l \cdot w \cdot h$  - dimensions of the micro-channel;  $C_{SiO_2}$  - concentration of the silica particles in the ethanol suspension;  
 200  $R = 150 \text{ nm}$  - radius of an individual particle;  $\rho_{SiO_2} \approx 2 \text{ g/cm}^3$  - density of amorphous silica;  $\varphi \approx 90.7\%$  - maximum  
 201 coefficient of the surface coverage for *hcp* lattice. Thus, in these conditions, the number of silica particles is 1000 times more than  
 202 the surface sites. This estimation demonstrates that such an excess concentration of silica particles might be sufficient for forming  
 203 the *hcp* lattice structure of CPC.

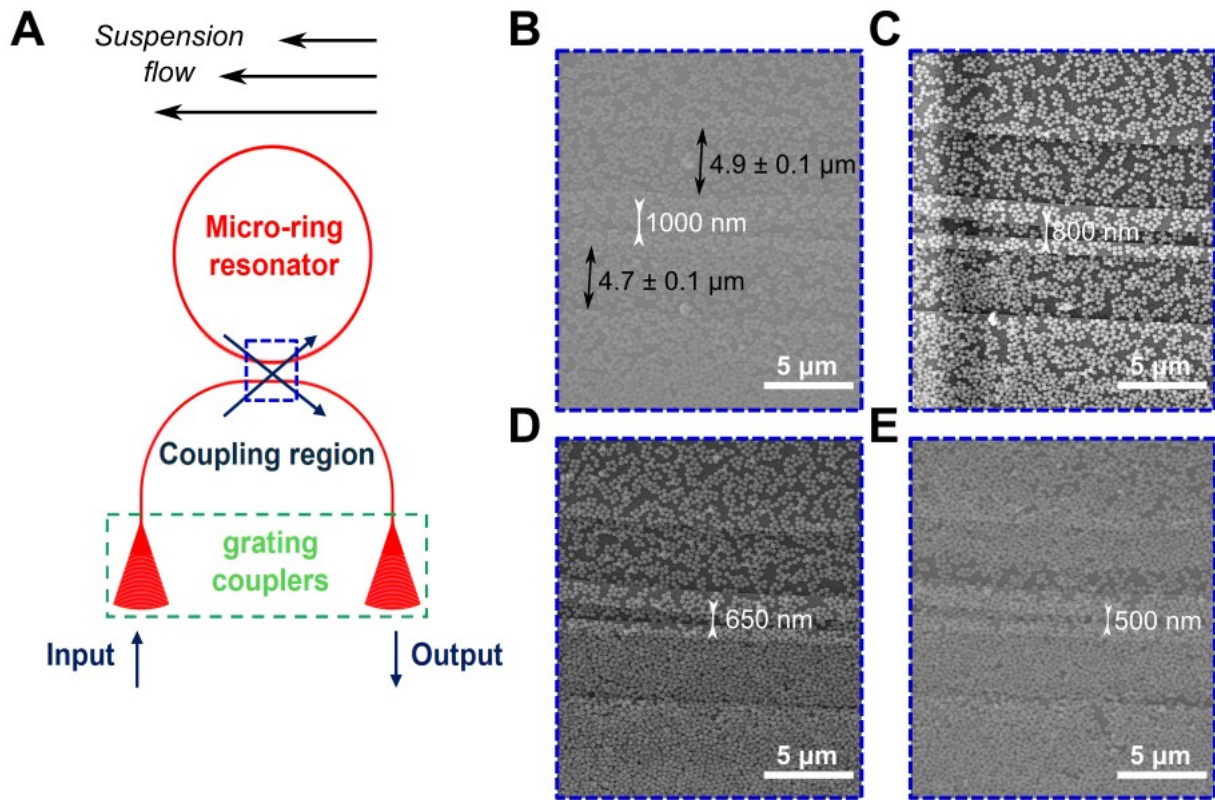

204

205 **Fig. S14.** The micro-ring resonator configuration (A) and silica layers deposited on the micro-ring resonator surfaces with a gap of  
 206 1000 nm (B), 800 nm (C), 650 nm (D), and 500 nm (E).

207

208 Furthermore, the structure of micro-ring resonators is quite complex for the estimation of regularities for forming *hcp* layers and  
 209 depends on the point, where we want to estimate the CPC formation. Here, we assessed how the CPC structure differs at the  
 210 contact area between the bus waveguide and MRR (**Fig. S14 A**) and the perpendicular area of the MRR towards the suspension  
 211 flow (**Fig. S15 A**). Analyzing the first configuration of nano-patterns and suspension flow, we observed that the CPC structure  
 212 inside the micro-ring and bus waveguide cavities is similar to the CPCs on the planar areas of the  $\text{Si}_3\text{N}_4$  surface. This fact might be  
 213 explained due to the parallel position of the cavity lines towards the particle flow, i.e., the dislocations in the CPC structure may  
 214 be defined by the narrowest cavities such as the gaps between the MRR and bus waveguides (**Fig. S14 B-E**). If the width of the  
 215 gap is less than the doubled diameter of the particle ( $< 600 \text{ nm}$ ), then silica particles can not be placed in the closely packed  
 216 structure and this provokes the formation of multilayers in the gap cavities.

217 Considering the configuration of the perpendicular orientation of the MRR cavities towards the flow (**Fig. S15 B**), we suggest that  
 218 in this case, the turbulent flows might appear close to the surface. Such deflection of flow state from the laminar regime to a  
 219 turbulent one can provide stochastic changes in the direction and velocity of the particles in the channel. We constructed the  
 220 COMSOL model of the flow distribution of pure ethanol in the studied microfluidic channel and surface patterns (**Fig. S15 C, D**),  
 221 and assessed the possibility of the appearance of the additional vorticity fields near the  $\text{Si}_3\text{N}_4$  surface. Wherein, we assumed the  
 222 laminar regime of the flow at the input of the channel (*Reynolds number*,  $Re = 500$ ). The additional vorticity fields as well  
 223 as the fluid pressure increase were observed at the borders of the nano-patterned cavities. Thus, we confirmed the formation of  
 224 turbulent flows, which might improve the structure of the CPC lattice inside the cavities, although to make the dislocations for  
 225 the CPC structure on the total chip surface due to the random behaviour of particle flows.

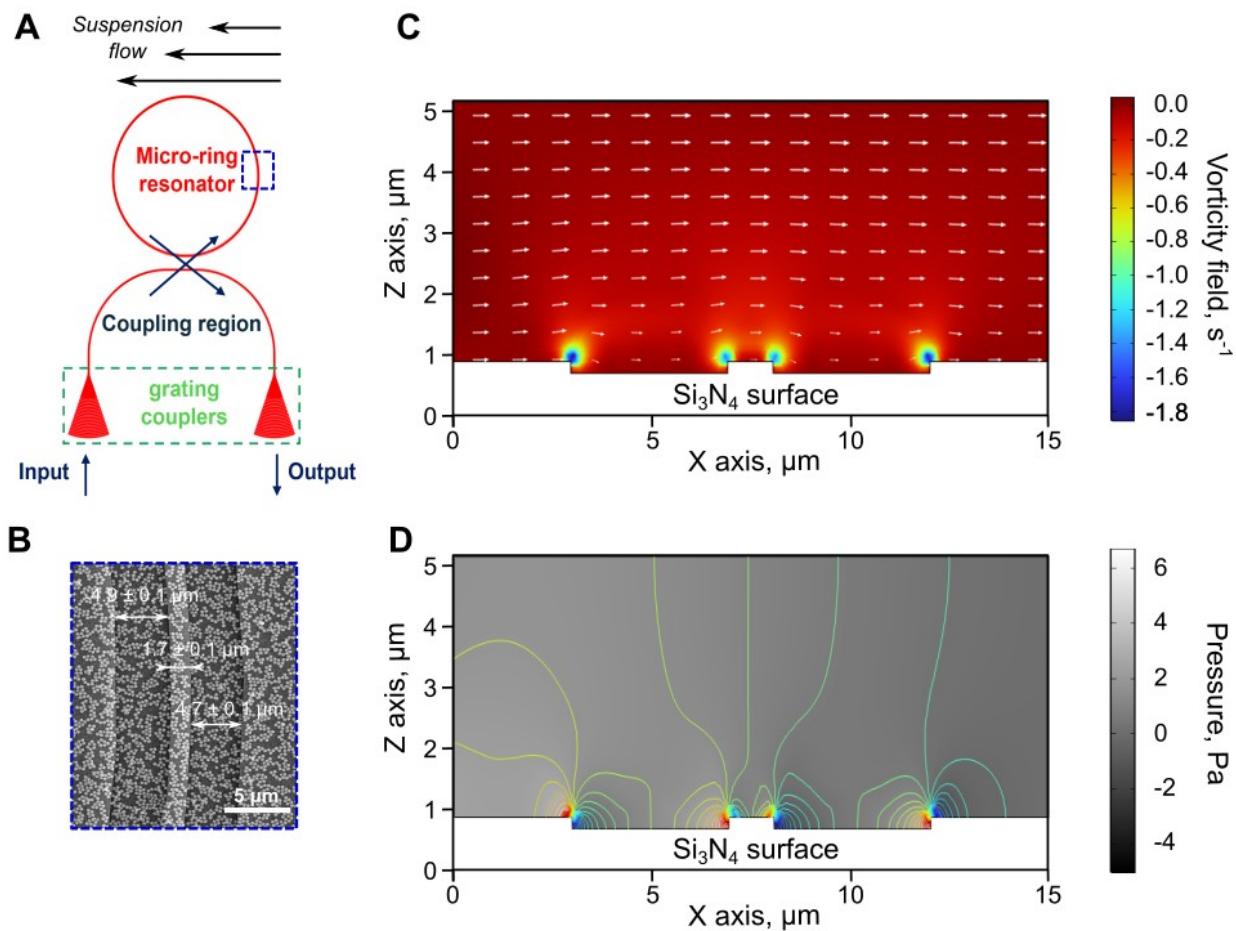

226

227 **Fig. S15.** The micro-ring resonator configuration (**A**) and silica layers deposited on the micro-ring resonator surface (**B**).  
 228 Distribution of vorticity flow field (**C**) and fluid pressure (**D**) for the ethanol flow in the microfluidic channels modeling by COMSOL  
 229 Multiphysics (*Reynolds number*,  $Re = 500$ ).

230

231

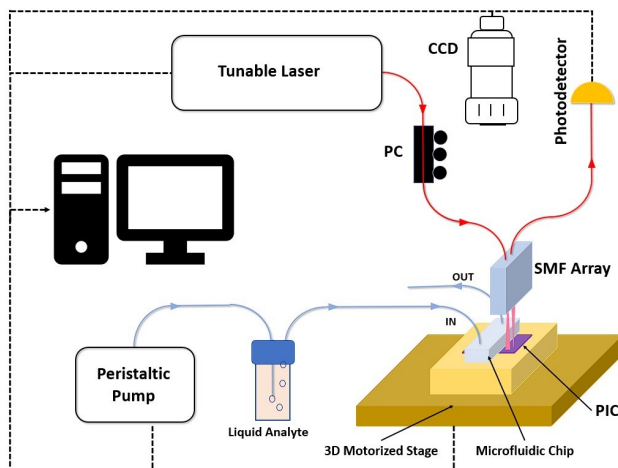

232

233 **Fig. S16. Experimental setup for gas sensing performance with silica monolayers modified O-ring resonators.** The dashed black  
234 lines indicate electronic connections, blue lines-microfluidic, and orange lines optical fiber connections.

235 To understand the effects of PEI modification and convective assembly, first, the transmission spectrum of all four devices was  
236 measured when there was only DI water in the channels. Following DI water, measurements were carried out before as well as  
237 after 20 minutes of pumping 1 mg/ml solution of PEI in DI water. Furthermore, the channel was washed by pumping DI water for  
238 10 minutes. All reagents were pumped at a flow rate of 20  $\mu\text{L}/\text{min}$ , except the colloidal silica suspension. Similarly, the transmission  
239 spectra were measured after convective assembly of particles and drying for one hour.

240 In the second part of the experiment, the setup consisted of main elements presented in **Fig. S16**. Mainly, three types of analyte  
241 vapours were used, i.e., DI water, ethanol, and acetone. A peristaltic pump and Drexel flask containing the studied analyte  
242 were connected in series with the inlet of the microfluidic setup. The air from the surroundings was pumped inside the liquid analyte  
243 to form air bubbles that quickly become saturated with the analyte molecules, compared to conventional vapours evaporated  
244 from a bulk surface. Another tube connected the microfluidic channels with the Drexel flask, and the saturated vapours were  
245 pumped towards the sensing elements.

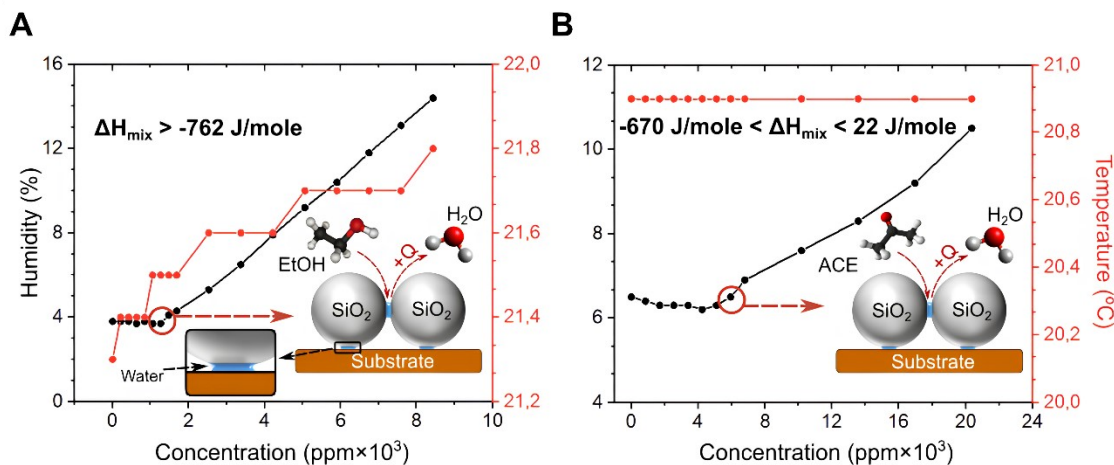

246

247 **Fig. S17. Influence of concentration of VOCs on the humidity and temperature by testing ethanol (A) and acetone (B) vapours.**

248 Initially, measurements without air flow in the channels were performed and used as a reference point. Following that, the  
249 transmission spectrum of MRR was measured after five minutes of pumping water vapours at the flow rate of 20  $\mu\text{L}/\text{min}$ . Before  
250 proceeding to the next analyte, the room air inside the channel was pumped at 100  $\mu\text{L}/\text{min}$  to observe the effects of air flow on

251 capillary condensation of analytes. Similarly, the vapours of ethanol and acetone were introduced respectively after five minutes  
 252 of air flow to determine their effects on condensed analytes.

## 253 S8 ADVANTAGE OF THE PROPOSED CONCEPT

254 Many methods for breath analysis have been explored throughout the last decade, from the earliest methods, as for instance,  
 255 gas chromatography coupled with mass spectrometers,<sup>s10</sup> to the most recent ones, such as electronic noses (E-noses).<sup>s11</sup> However,  
 256 the limitations of mass spectrometry include its inability to differentiate between two volatile compounds that share the same  
 257 most pronounced mass-to-charge ratio, potentially leading to ambiguities in compound identification. In turn, despite the  
 258 advantages of E-noses related to high sensitivity and cost-effectiveness, E-noses suffer from several significant drawbacks, e.g., a  
 259 need for a training prior to the use and proper calibration to cope with the discreteness.<sup>s12</sup> Other than conventional methods,  
 260 optical spectroscopic methods using lasers have also been the center of attention.<sup>s13</sup> Despite that, such techniques are not  
 261 portable, rather complex and expensive. PIC-based sensors majorly operate based on the refractive index changes in a surface  
 262 layer of waveguides. This is a method similar to laser spectroscopic techniques, information of gases can be gathered based on  
 263 the absorption occurring in an optical mode of the waveguide. Although, the main challenge is to reach lower limits of detection.  
 264 To overcome this challenge, modification of the surface of the photonic circuits is commonly applied. Mostly, chemically  
 265 functionalized nano-porous materials,<sup>s14</sup> analyte-sensitive organic material,<sup>s15</sup> or metal-organic framework coatings<sup>s16</sup> are  
 266 preferred. The activity in these areas indicates that with chemically functionalized porous coatings and their combination with  
 267 the PICs, gas sensors for biomedical applications can be fully realized. However, this still poses similar issues to that of chemical  
 268 semiconductor sensors. The performance of chemisorption-based sensing elements always deteriorates over time.

269

270 **Table S1.** Colloidal Photonic Crystals (CPCs) for gas sensing applications

| Sensor signal generation                    | Sensing material                                                                                                 | CPC formation method | Detected analytes                          | Reference |
|---------------------------------------------|------------------------------------------------------------------------------------------------------------------|----------------------|--------------------------------------------|-----------|
| Whispering gallery mode                     | Mesoporous SiO <sub>2</sub> microspheres decorated by Pd nanoparticles                                           | Dip-coating          | Hydrogen                                   | [s16]     |
| Bragg stacks                                | Mesoporous SiO <sub>2</sub> nanoparticles and TiO <sub>2</sub> sols                                              | Spin-coating         | Toluene                                    | [s17]     |
| Resistivity / Reflectance                   | PEDOT/PPy inverse opals                                                                                          | Electrodeposition    | Ammonia                                    | [s18]     |
| Bragg stacks                                | Alternating SiO <sub>2</sub> / TiO <sub>2</sub> nanoparticle layers functionalized with different alkoxy silanes | Spin-coating         | Alcohols / Volatiles from bacteria species | [s19]     |
| Bragg stacks                                | SiO <sub>2</sub> monolayer on Ta <sub>2</sub> O <sub>5</sub> /SiO <sub>2</sub> photonic crystal surface          | Dip-coating          | Acetone, Ammonia, Ethanol, 2-Propanol      | [s5]      |
| Transmittance / Bragg peak wavelength shift | Polystyrene nanoparticle monolayer                                                                               | Dip-coating          | Ethanol                                    | [s20]     |
| Bragg stacks                                | Alternating layers of amorphous poly(p-                                                                          | Spin-coating         | Carbon tetrachloride, benzene, 1,2-        | [s21]     |

271

272 The developed sensor based on a combination of PICs and microfluidics has the potential to bring new opportunities in gas  
273 sensing, and various other sectors including colloidal science, thin film coatings on inert surfaces, gas sensing, colloidal photonic  
274 crystals for photonic integrated circuits with new functionalities, the study of optical properties of bound water in nanopores.

275 Microfluidic convective assembly helps to achieve the specific patterns of silica CPCs on  $Si_3N_4$  substrates with a surface coverage  
276 coefficient of up to 59%. In addition, the integration of CPC with PIC on  $Si_3N_4$  platform enhances the optical PIC sensing  
277 capabilities in terms of sensitivity and specificity due to leveraging the unique properties of CPCs, coupled with the high optical  
278 transparency of  $Si_3N_4$  in the near IR range.

279

280 In terms of real-time operation, this sensor will handle each analyte differently depending on changes in the effective refractive  
281 index of the surface layer. **Fig. S18** shows the dependence of the relative shift of resonance positions in the transmission spectrum  
282 of MRRs recorded by introducing DI water, ethanol, and acetone vapours. Relying on the average change in the relative resonance  
283 position shift over time and on the experimental noise of the setup equal to about 1 pm is demonstrated in our previously study,<sup>57</sup>  
284 <sup>58</sup> the average response time of the system for ethanol vapours is  $\approx 7$  s, for acetone vapours  $\approx 18$  s, respectively. Compared to  
285 other sensor systems for real-time ethanol vapour detection, the current configuration shows promising results when compared  
286 to commercially available electrochemical ( $< 30$  s),<sup>523</sup> semiconductors (60 - 90 s)<sup>524</sup> and optical sensors (6 s)<sup>525</sup> for exhaled breath  
287 analysis on the alcohol intoxication degree. Still, the evaluation of the determination range and the number of cycles of continuous  
288 operation of the proposed sensor requires extra studies.

289

290 Additionally, we estimated the analytical characteristics of the proposed sensor. Here, the micro-ring with the deposited silica  
291 layer is exposed to the saturated vapours of acetone and ethanol. To estimate the pressure of the saturated vapours in the micro-  
292 channels we used the Antoine equation.<sup>526</sup> Applying the assumption of the ideal gas, the sensitivity coefficients were equal to -  
293  $5.9 \cdot 10^{-4}$  pm/ppm and  $-5.7 \cdot 10^{-5}$  pm/ppm for ethanol and acetone vapours, respectively. That means such sensing configuration is  
294  $\sim 10$  times sensitive to ethanol vapours than to acetone ones. This is supported by the values of LoD for ethanol and acetone which  
295 are equal to  $5.1 \cdot 10^3$  ppm and  $53 \cdot 10^3$  ppm, accordingly.

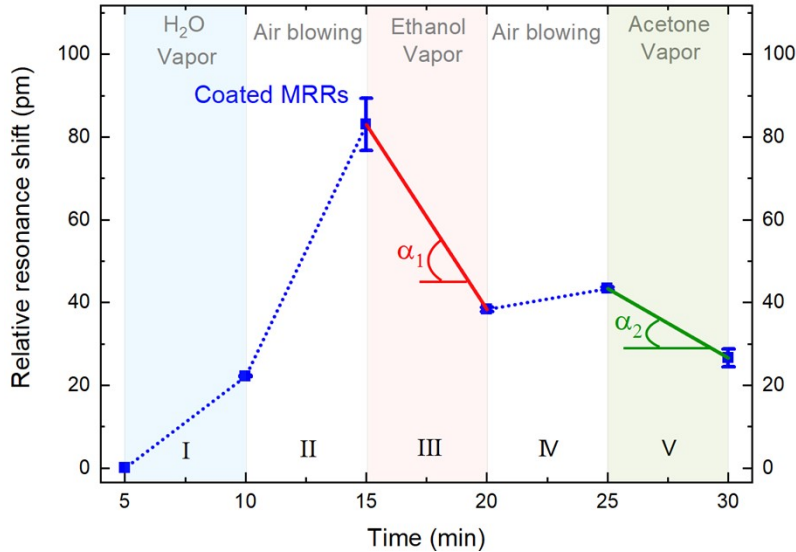

296

297 **Fig. S18. Gas sensing performance for micro-ring resonators coated and uncoated by  $SiO_2$  film:** Relative shift of resonance  
298 positions in the transmission spectrum of modified MRR recorded by introducing DI water, ethanol, and acetone vapours. The  
299 blue dashed line showed the shifting of the resonance position of the ring waveguides coated by  $SiO_2$  monolayers. The red and  
300 green solid lines showed the shifting of the resonance position of the ring waveguides coated by  $SiO_2$  monolayers for ethanol and  
301 acetone vapours, respectively.  $\alpha_1$  (-8.93 pm/min) and  $\alpha_2$  (-3.35 pm/min) are the derivatives of the resonance shift over time for  
302 the modified sensor for the ethanol and acetone vapours, respectively. Error bars coloured blue solid line are the standard  
303 deviation of coated MRRs.

## 304 REFERENCES

- 305 s1 Open Source Computer Vision, [https://docs.opencv.org/4.x/d7/d4d/tutorial\\_py\\_thresholding.html](https://docs.opencv.org/4.x/d7/d4d/tutorial_py_thresholding.html), (accessed 7  
306 February 2024).
- 307 s2 D. Feng, D. Weng and J. Wang, *Micromachines*, 2018, **9**.
- 308 s3 T. Ohmi, *J. Electrochem. Soc.*, 1996, **143**, 2957–2964.
- 309 s4 T. Yamashita and K. Ando, *Ultrason. Sonochem.*, 2019, **52**, 268–279.
- 310 s5 V. Zaytsev, T. I. Ermatov, F. S. Fedorov, N. Balabin, P. O. Kapralov, J. V. Bondareva, D. O. Ignatyeva, B. N. Khlebtsov, S. S.  
311 Kosolobov, V. I. Belotelov et al., *Analytical chemistry*, 2022, **94**, 12305–12313.
- 312 s6 A. Kuzin, V. Chernyshev, V. Kovalyuk, P. An, A. Golikov, S. Svyatodukh, S. Perevoschikov, I. Florya, A. Schulga, S. Deyev et al.,  
313 *Applied Physics Letters*, 2023, **123**.
- 314 s7 A. Kuzin, K. Panda, V. Chernyshev, I. Florya, V. Kovalyuk, P. An, A. Golikov, G. Chulkova, D. Kolesov, D. Gorin et al., *Applied  
315 Physics Letters*, 2024, **124**.
- 316 s8 A. Kuzin, V. Chernyshev, V. Kovalyuk, P. An, A. Golikov, R. Ozhegov, D. Gorin, N. Gippius and G. Goltsman, *Optics Letters*,  
317 2022, **47**, 2358–2361.
- 318 s9 A. Kuzin, V. Kovalyuk, A. Golikov, A. Prokhodtsov, A. Marakhin, S. Ferrari, W. Pernice, N. Gippius and G. Goltsman, *Journal  
319 of Physics: Conference Series*, 2019, p. 012181.
- 320 s10 U. Tisch, I. Schlesinger, R. Ionescu, M. Nassar, N. Axelrod, D. Robertman, Y. Tessler, F. Azar, A. Marmur, J. Aharon-Peretz et  
321 al., *Nanomedicine*, 2013, **8**, 43–56.
- 322 s11 V. H. Tran, H. P. Chan, M. Thurston, P. Jackson, C. Lewis, D. Yates, G. Bell and P. S. Thomas, *IEEE Sensors Journal*, 2010, **10**,  
323 1514–1518.
- 324 s12 F. S. Fedorov, N. P. Simonenko, P. V. Arsenov, V. Zaytsev, T. L. Simonenko, B. V. Goikhman, I. A. Volkov, E. P. Simonenko and  
325 A. G. Nasibulin, *Applied Surface Science*, 2022, **606**, 154717.
- 326 s13 R. Claps, F. V. Englich, D. P. Leleux, D. Richter, F. K. Tittel and R. F. Curl, *Applied Optics*, 2001, **40**, 4387–4394.
- 327 s14 G. Antonacci, J. Goyvaerts, H. Zhao, B. Baumgartner, B. Lendl and R. Baets, *APL photonics*, 2020, **5**.
- 328 s15 R. Janeiro, R. Flores and J. Viegas, *Scientific reports*, 2019, **9**, 17099.
- 329 s16 J. Tao, X. Wang, T. Sun, H. Cai, Y. Wang, T. Lin, D. Fu, L. L. Y. Ting, Y. Gu and D. Zhao, *Scientific reports*, 2017, **7**, 41640.
- 330 s17 Y. Yue, H. Ding and C. Chen, *International Journal of Hydrogen Energy*, 2021, **46**, 1403–1410.
- 331 s18 J. Kobler, B. V. Lotsch, G. A. Ozin and T. Bein, *ACS nano*, 2009, **3**, 1669–1676.
- 332 s19 Q. Zhong, H. Xu, H. Ding, L. Bai, Z. Mu, Z. Xie, Y. Zhao and Z. Gu, *Colloids and Surfaces A: Physicochemical and Engineering  
333 Aspects*, 2013, **433**, 59–63.
- 334 s20 L. D. Bonifacio, D. P. Puzzo, S. Breslav, B. M. Willey, A. McGeer and G. A. Ozin, *Advanced Materials*, 2010, **22**.
- 335 s21 R. Pernice, G. Adamo, S. Stivala, A. Parisi, A. C. Busacca, D. Spigolon, M. A. Sabatino, L. D'Acquisto and C. Dispenza, *Optical  
336 Materials Express*, 2013, **3**, 1820–1833.
- 337 s22 P. Lova, C. Bastianini, P. Giusto, M. Patrini, P. Rizzo, G. Guerra, M. Iodice, C. Soci and D. Comoretto, *ACS applied materials  
338 & interfaces*, 2016, **8**, 31941–31950.
- 339 s23 Dräger UK, [https://www.draeger.com/en\\_uk/Products/Alcotest-6000](https://www.draeger.com/en_uk/Products/Alcotest-6000) (accessed June 25, 2024).
- 340 s24 Alco Prevention Canada, <https://alcoprevention.com/en/product/alco-mini-08-breathalyzer/> (accessed June 25, 2024)
- 341 s25 Laser Systems, <https://www.lsystems.ru/en/product/alcoframes/> (accessed June 25, 2024)
- 342 s26 A. F. N. W. Adi, T. G. Wulanndari, A. Wiguno and K. Kuswandi, *IOP Conf. Ser.: Mater. Sci. Eng.*, 2021, **1053**, 012137.
